# Supplementary material for: Whose voices should shape global health education? Curriculum codesign and codelivery by people with direct expertise and lived experience
Source: HighWire-hosted journal article supplement (doi:10.1136/bmjgh-2021-006262), 2021-09-01
Supplement: bmjgh-2021-006262supp001_data_supplement.pdf [file bmjgh-2021-006262supp001_data_supplement.pdf]

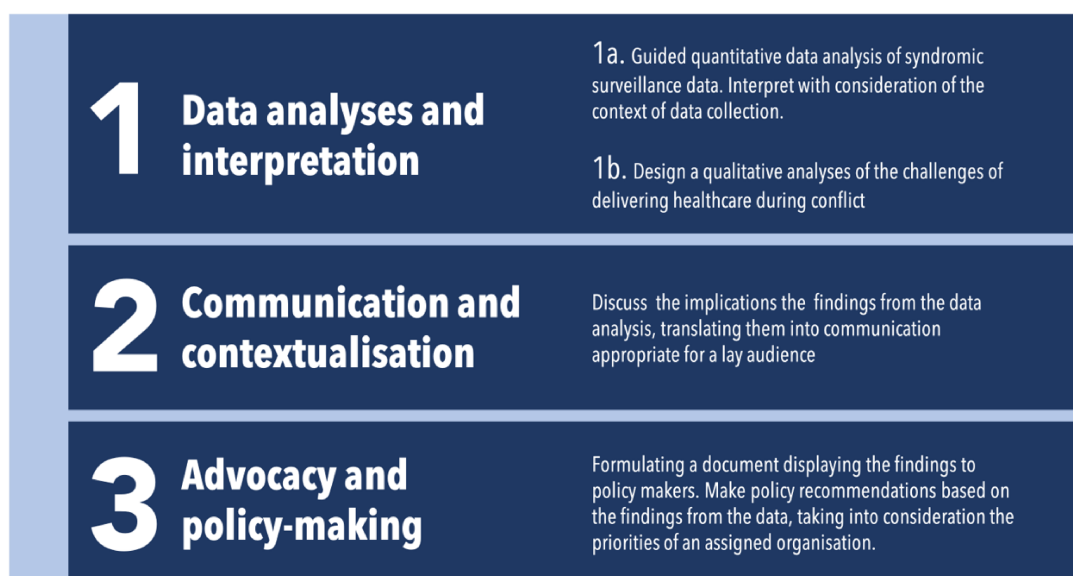

**Optional supplementary figure: Overview of the structure of the assessment designed. The assessment was divided into three parts, each of which assessed different GH skill sets via a relevant, real-world task.**
